# Supplementary material for: Was there a glacial outburst flood in the Torngat Mountains during Marine Isotope Stage 3?
Source: Copernicus journal article supplement (doi:10.5194/cp-2021-132), 2021-10-18
Supplement: Supplementary file [file cp-2021-132-AC9-supplement.pdf]

We use the following equation,

$$N(x) = N(\text{surface})e^{-\rho/\Lambda * x},$$

where  $N$  is cosmogenic nuclide concentration,  $x$  is depth below the surface,  $\rho$  is rock density, and  $\Lambda$  is attenuation length. We assume density is  $2.9 \text{ g/cm}^3$  and attenuation length is  $165 \text{ cm}$ .
